# Supplementary material for: The Value of Laboratory Parameters for Anemia, Renal Function, Systemic Inflammation and Nutritional Status as Predictors for Outcome in Elderly Patients with Head-and-Neck Cancers
Source: MDPI journal article supplement (doi:10.3390/cancers12061698), 2020-06-26
Supplement: s1 [file s1]

## Supplementary Materials

# The Value of Laboratory Parameters for Anemia, Renal Function, Systemic Inflammation and Nutritional Status as Predictors for Outcome in Elderly Patients with Head-and-Neck Cancers

Alexander Rühle, Erik Haehl, Hélène David, Tobias Kalckreuth, Tanja Sprave, Raluca Stoian, Constantinos Zamboglou, Eleni Gkika, Andreas Knopf, Anca-Ligia Grosu and Nils Henrik Nicolay

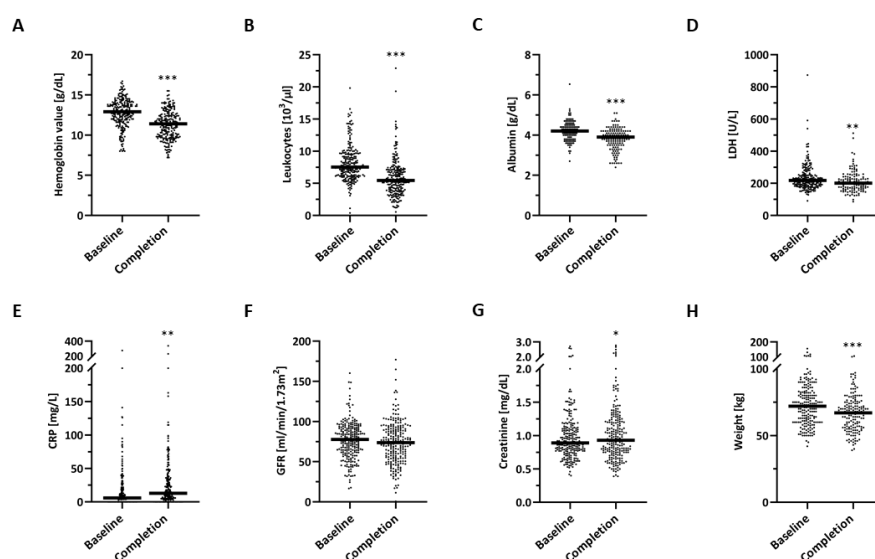

**Supplementary Figure 1.** Scatter dot plots demonstrating the distribution of several blood values and body weight at the beginning and at the end of (chemo)radiotherapy treatment. Groups were compared using two-sided paired t-tests. \* $p<0.05$ , \*\* $p<0.01$ , \*\*\* $p<0.001$ .

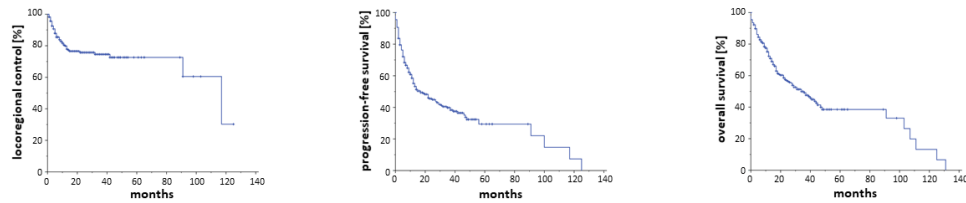

**Supplementary Figure 2.** LRC, PFS and OS of the complete patient cohort consisting elderly HNSCC patients treated by (chemo)radiotherapy in our institution between 2010 and 2018 (n=246).

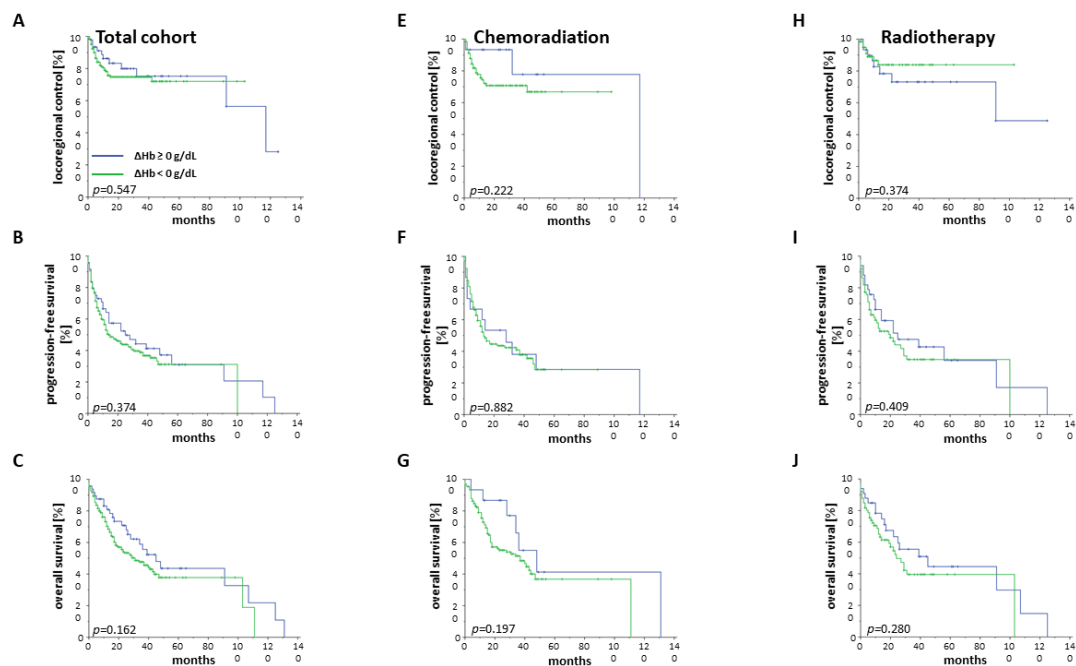

**Supplementary Figure 3.** Kaplan-Meier curves for LRC, PFS and OS in dependence of the peri-therapeutic hemoglobin change. (A-C) Kaplan-Meier curves for the entire elderly HNSCC cohort. (D-F) Kaplan-Meier curves for the chemoradiation group. (G-I) Kaplan-Meier curves for the radiotherapy group. *P*-values of log-rank tests are shown.

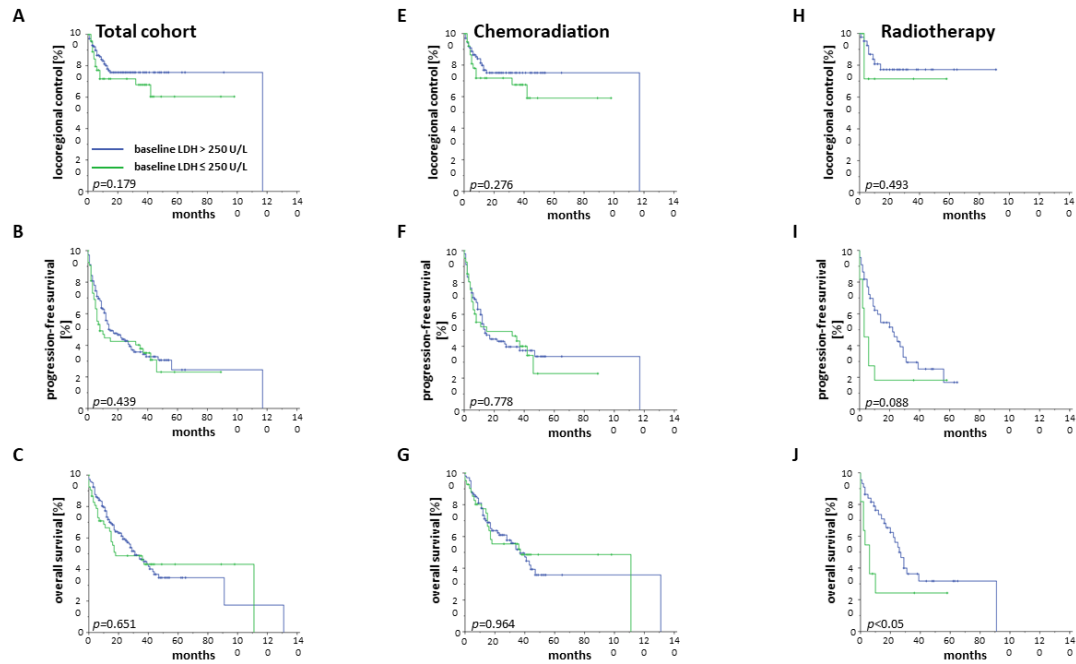

**Supplementary Figure 4.** LRC, PFS and OS stratified by the baseline LDH concentration. (A-C) Kaplan-Meier curves for the entire cohort with existing LDH values (n=199). (D-F) Kaplan-Meier curves of patients undergoing chemoradiation with accessible LDH values (n=144). (G-I) Kaplan-Meier curves of patients who were treated with radiotherapy and exhibited available LDH values (n=55). Log-rank-tests were performed for comparisons.

**Table S1.** Treatment details for (chemo)radiotherapy of elderly HNSCC patients ( $n = 246$ ). Chemotherapy completion was assumed, if patients received at least 200 mg/m<sup>2</sup> cisplatin or 450 mg/m<sup>2</sup> carboplatin.

| Radiation therapy   | <i>n</i> | %    |
|---------------------|----------|------|
| completed           | 213      | 86.6 |
| discontinued        | 33       | 13.4 |
| definitive          | 166      |      |
| completed           | 141      | 84.9 |
| adjuvant            | 80       |      |
| completed           | 72       | 90.0 |
| adjuvant            |          |      |
| mean radiation dose | 60.2 Gy  |      |
| mean single dose    | 2.0 Gy   |      |
| definitive          |          |      |
| mean radiation dose | 65.4 Gy  |      |
| mean single dose    | 2.0 Gy   |      |
| Chemotherapy        | <i>n</i> | %    |
| planned             | 147      |      |
| completed           | 109      | 74.1 |

**Table S2.** Toxicity results after (chemo)radiotherapy of elderly patients with HNSCC according to the Common Terminology Criteria for Adverse Events (CTCAE) v5.0.

| Acute       | <i>n</i> | %    |
|-------------|----------|------|
| CTCAE ≤ 2   | 108      | 43.9 |
| CTCAE 3 – 4 | 138      | 56.1 |

|                |     |      |
|----------------|-----|------|
| CTCAE 5        | 0   | 0    |
| <b>Chronic</b> |     |      |
| CTCAE 0        | 31  | 13.7 |
| CTCAE 1 – 2    | 150 | 66.4 |
| CTCAE 3 – 4    | 45  | 19.9 |
| CTCAE 5        | 0   | 0    |

**Table S3:** Toxicity results consisting various (chemo)radiotherapy-related adverse reactions according to the Common Terminology Criteria for Adverse Events (CTCAE) v5.0.

| <b>Acute</b>                   | <b>CTCAE grade</b> |          |          |          |          |          |
|--------------------------------|--------------------|----------|----------|----------|----------|----------|
|                                | <b>0</b>           | <b>1</b> | <b>2</b> | <b>3</b> | <b>4</b> | <b>5</b> |
| <b>dermatitis</b>              | 76                 | 63       | 83       | 19       | 0        | 0        |
| <b>dysphagia</b>               | 52                 | 36       | 75       | 80       | 0        | 0        |
| <b>nausea</b>                  | 182                | 14       | 23       | 22       | 0        | 0        |
| <b>mucositis</b>               | 66                 | 32       | 98       | 46       | 0        | 0        |
| <b>xerostomia</b>              | 127                | 42       | 69       | 4        | 0        | 0        |
| <b>hoarseness</b>              | 202                | 19       | 18       | 3        | 0        | 0        |
| <b>dyspnea</b>                 | 217                | 12       | 9        | 4        | 0        | 0        |
| <b>dysgeusia</b>               | 117                | 29       | 96       | 0        | 0        | 0        |
| <b>pain</b>                    | 108                | 35       | 71       | 28       | 0        | 0        |
| <b>cytopenia</b>               | 44                 | 51       | 82       | 67       | 2        | 0        |
| <b>weight loss</b>             | 41                 | 57       | 37       | 9        | 0        | 0        |
| <b>acute kidney injury</b>     | 236                | 0        | 0        | 10       | 0        | 0        |
| <b>Chronic</b>                 | <b>0</b>           | <b>1</b> | <b>2</b> | <b>3</b> | <b>4</b> | <b>5</b> |
| <b>skin toxicity</b>           | 184                | 28       | 7        | 0        | 0        | 0        |
| <b>dysphagia</b>               | 107                | 27       | 54       | 31       | 0        | 0        |
| <b>nausea</b>                  | 201                | 4        | 4        | 2        | 0        | 0        |
| <b>mucositis</b>               | 186                | 17       | 12       | 3        | 0        | 0        |
| <b>xerostomia</b>              | 72                 | 62       | 81       | 3        | 0        | 0        |
| <b>hoarseness</b>              | 193                | 19       | 6        | 0        | 0        | 0        |
| <b>dyspnea</b>                 | 205                | 7        | 4        | 2        | 0        | 0        |
| <b>dysgeusia</b>               | 102                | 54       | 62       | 0        | 0        | 0        |
| <b>pain</b>                    | 170                | 18       | 26       | 4        | 0        | 0        |
| <b>cytopenia</b>               | 205                | 5        | 5        | 1        | 0        | 0        |
| <b>renal insufficiency</b>     | 204                | 5        | 5        | 4        | 0        | 0        |
| <b>jaw and dental injuries</b> | 181                | 6        | 20       | 10       | 0        | 0        |

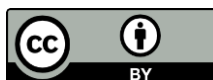

© 2020 by the authors. Licensee MDPI, Basel, Switzerland. This article is an open access article distributed under the terms and conditions of the Creative Commons Attribution (CC BY) license (<http://creativecommons.org/licenses/by/4.0/>).
